# Supplementary material
Source: PubMed Central journal article supplement (PMC130635)
Supplement: pnas_192464099_1.pdf [file pnas_192464099_1.pdf]

**Table 3. Neandertal human remains (1997–2000)**

| No.                | Element                                    | Description                                                                                                                                                                                                        |
|--------------------|--------------------------------------------|--------------------------------------------------------------------------------------------------------------------------------------------------------------------------------------------------------------------|
| NN 1*              | Humerus, right<br><b>Not Neandertal 1</b>  | Splinter of lateral midshaft, maximum length 107.4 mm (proximal--distal), maximum breadth 19.1 mm. Large segments of deltoid tuberosity and greater tubercle crest. (Conjoins with 2, 3, 47)                       |
| NN 2*              | Humerus, right<br><b>Not Neandertal 1</b>  | Splinter of ventral midshaft, maximum length 110.6 mm (proximal--distal), maximum breadth 20.3 mm. Portions of greater tubercle crest, intertubercular groove, and lesser tubercle crest. (Conjoins with 1, 3, 47) |
| NN 3*              | Humerus – right<br><b>Not Neandertal 1</b> | Splinter of posterior midshaft, maximum length 57.5 mm (proximal--distal), maximum breadth 13.7 mm. (Conjoins with 1, 2, 47)                                                                                       |
| NN 4               | Tibia, right                               | Ventral midshaft segment, maximum length 70.4 mm (proximal--distal), maximum breadth 20.2 mm. Segment of anterior margin. [Conjoins with 23]                                                                       |
| NN 5               | Tibia, right                               | Ventral shaft with tibial tuberosity and anterior margin, maximum length 42.2 mm (proximal--distal), maximum breadth 33.2 mm. [Conjoins with 48]                                                                   |
| NN 6               | Humerus, left (?)                          | Proximal articular surface (head). Maximum dimensions 41.1 × 34 mm.)                                                                                                                                               |
| NN 7               | Cervical vertebra                          | Probable C-6. Complete except for spine and lateral transverse processes. Total breadth 51.2 mm.                                                                                                                   |
| NN 8               | Rib fragment                               | Right (?), below angle; preserves costal groove. Maximum length 45.5 mm. [Conjoins with 12]                                                                                                                        |
| NN 9               | Rib fragment                               | Maximum length 60.6 mm.                                                                                                                                                                                            |
| NN 10              | Rib fragment                               | Right, near angle with costal groove. Maximum length 47.9 mm.                                                                                                                                                      |
| NN 11              | Rib fragment                               | Small piece with section removed. Dimensions 11 × 15.9 mm.                                                                                                                                                         |
| NN 12              | Rib fragment                               | Right (?), maximum length 30.9 mm. [Conjoins with 8]                                                                                                                                                               |
| NN 13              | Femur, left.<br><b>Neandertal 1</b>        | Piece of lateral femoral condyle (29.8 × 12.3 mm dimensions on articular surface). <b>Fits on Neandertal 1.</b>                                                                                                    |
| NN 14 <sup>†</sup> | Innominate, right                          | Adult ischium with ischial tuberosity and articular surface of acetabulum. Maximum dimensions 76.5 mm (cranio--caudal) × 48 mm.                                                                                    |
| NN 15              | Sacrum                                     | Left articular process for L5. Maximum dimensions 21 × 14.4 mm.                                                                                                                                                    |
| NN 16              | Maxillary molar, left                      | Permanent complete M <sup>1</sup> or M <sup>2</sup> . Moderate to heavy occlusal and interproximal wear. Mesial interproximal groove.                                                                              |
| NN 17              | Cervical vertebra                          | Right inferior articular surface of atlas. Maximum dimensions (articular facet) 20.5 × 17.1 mm.                                                                                                                    |
| NN 18              | Cervical vertebra                          | Left articular process of C3-6. Maximum dimensions 17.3 × 15 mm.                                                                                                                                                   |
| NN 19              | Sphenoid                                   | Right adult sphenoid body with elongated sphenoid sinus. Maximum dimensions 34.4 (anteroposterior) × 17.9 mm.                                                                                                      |
| NN 20              | Metacarpal II, right                       | Proximal articular surface with large part of shaft. Adult. Maximum length 53 mm.                                                                                                                                  |
| NN 21              | Capitate, left                             | Complete, adult. Maximum dimensions 23.5 × 17.8 mm.                                                                                                                                                                |
| NN 22              | Cuneiform III, right                       | Dorsal part of lateral cuneiform of adult. Maximum proximal--distal dimension 23.8 mm.                                                                                                                             |
| NN 23              | Tibia, right                               | Anterior shaft frequent. Maximum proximal--distal dimension 49.2 mm, maximum breadth 19.9 mm. [Conjoins with 4]                                                                                                    |
| NN 24*             | Humerus, right                             | Distal metaphysis. Epicondyles with superior olecranon fossa and                                                                                                                                                   |

| No.                | Element                                           | Description                                                                                                                                                                                     |
|--------------------|---------------------------------------------------|-------------------------------------------------------------------------------------------------------------------------------------------------------------------------------------------------|
|                    | <b>Not Neandertal 1</b>                           | medial epicondylar ridge. Maximum dimensions 85.4 mm. (proximal--distal) × 47.1 mm.                                                                                                             |
| NN 25              | Tibia, right (?)                                  | Shaft fragment. Maximum dimensions 137.9 mm (proximal--distal) × 22 mm.                                                                                                                         |
| NN 26              | Cervical vertebra                                 | Body with left articular facets and lamina C 5-7. [Conjoins with 27]                                                                                                                            |
| NN 27              | Cervical vertebra                                 | Right articular facets and lamina C 5-7. [ Conjoins with 26]                                                                                                                                    |
| NN 28              | Metacarpal II or III, left (?)                    | Shaft fragment lacking both articular surfaces. Maximum length 40 mm.                                                                                                                           |
| NN 29              | Manual phalanx                                    | Distal row. Adult. Right ray 2 (?). Maximum length 21. 7 mm.                                                                                                                                    |
| NN 30              | Manual phalanx, left                              | Proximal row, complete except ulnar side of head. Ray 5. Maximum length 33. 6mm.                                                                                                                |
| NN 31              | Maxillary molar, right                            | Complete permanent M <sup>2</sup> . Moderate occlusal and distal interproximal wear. Heavy mesial interproximal wear.                                                                           |
| NN 32              | Manual phalanx, left                              | Pollex, proximal row. Maximum length 31.3 mm.                                                                                                                                                   |
| NN 33              | Maxillary molar, left                             | Permanent M <sup>3</sup> . Light to moderate occlusal and mesial interproximal wear. No distal interproximal facet. Complete except lingual root.                                               |
| NN 34              | Facial fragment<br><b>Neandertal 1</b>            | Left zygomatic with adhering maxillary body, including lateral maxillary sinus. Maximum dimensions 66.2 mm. × 54.3 mm. Internal sinus pathology. <b>Fits on Neandertal 1.</b>                   |
| NN 35              | Temporal, right<br><b>Neandertal 1</b>            | Fragment just posterior to mastoid process - portion of digastric groove and sigmoid sinus sulcus (interior) preserved. Maximum anterior-posterior length 40.6 mm. <b>Fits on Neandertal 1.</b> |
| NN 36              | Innominate                                        | Acetabular fossa with small segment of lunate articular surface rim. Maximum dimensions 29.3 × 24.9 mm. Right (?).                                                                              |
| NN 37              | Lunate, left                                      | Complete, adult specimen. Maximum dimensions 16.8 × 20.1 mm.                                                                                                                                    |
| NN 38              | Calcaneus (?)                                     | Right (?) with portion of tuberosity.                                                                                                                                                           |
| NN 39              | Rib fragment                                      | Right (?), just ventral to tubercle. Maximum length 36.4 mm.                                                                                                                                    |
| NN 40              | Occipital                                         | Right portion of adult nuchal plane with foramen magnum rim. Maximum dimensions 36.5 mm × 25.1 mm.                                                                                              |
| NN 41              | Human (?)                                         | Proximal ulnar segment (?). Maximum dimensions 23 × 18.3 mm.                                                                                                                                    |
| NN 42 <sup>‡</sup> | Ulna, right<br><b>Not Neandertal 1</b>            | Shaft fragment, maximum length 61.2 mm. Supinator and interosseous crests partially preserved. [Conjoins with 43, 44(?), 45 (?), 46, 59]                                                        |
| NN 43 <sup>‡</sup> | Ulna, right<br><b>Not Neandertal 1</b>            | Shaft fragment, maximum length 56.2 mm. Preserves base of coronoid process. [Conjoins with 42, 44 (?), 45 (?), 46, 59]                                                                          |
| NN 44 <sup>‡</sup> | Ulna, right<br><b>Not Neandertal 1</b>            | Small portion of articular surface. Found associated with, but not connected to, 43. Possibly conjoins with other right ulnar pieces.                                                           |
| NN 45 <sup>‡</sup> | Ulna, right<br><b>Not Neandertal 1</b>            | Small angled piece of coronoid and radial articular surfaces. Found associated with, but not connected to, 43. Possibly conjoins with other right ulnar pieces.                                 |
| NN 46 <sup>‡</sup> | Ulna, right<br><b>Not Neandertal 1</b>            | Fragment of shaft (35.3 mm maximum length) with nutrient foramen. Conjoins with 42, 43, 44 (?), 45 (?), 59]                                                                                     |
| NN 47*             | Humerus, right<br><b>Not Neandertal 1</b>         | Mid-shaft splinter. Maximum dimensions 55.4 (Proximal--distal) × 12 mm. [Conjoins with 1, 2, 3]                                                                                                 |
| NN 48              | Tibia, right                                      | Anterior shaft fragment. Maximum length (proximal--distal) 45.7 mm. [Conjoins with 5]                                                                                                           |
| NN 49              | Rib fragment                                      | Uncertain side. Midshaft, below angle. Maximum length 35.2 mm.                                                                                                                                  |
| NN 50 <sup>§</sup> | Maxillary molar, right<br><b>Not Neandertal 1</b> | Deciduous dm <sup>2</sup> crown with heavy occlusal and interproximal wear. Resorbed roots.                                                                                                     |
| NN 51              | Premolar, right                                   | Permanent P <sup>4</sup> . Heavy occlusal and interproximal wear.                                                                                                                               |
| NN 52              | Mandible                                          | Basilar portion of symphysis with digastric fossa and genial crest. Maximum length (coronal plane) 37.8 mm.                                                                                     |
| NN 53              | Tubular bone splinter                             | Unknown element. Maximum dimensions 42.4 mm (proximal--                                                                                                                                         |

| No.                | Element                                       | Description                                                                                                                              |
|--------------------|-----------------------------------------------|------------------------------------------------------------------------------------------------------------------------------------------|
|                    |                                               | distal) × 8.7 mm.                                                                                                                        |
| NN 54              | Not human                                     |                                                                                                                                          |
| NN 55              | Mandibular incisor, left                      | Permanent I <sub>1</sub> . Heavy occlusal and interproximal wear.                                                                        |
| NN 56              | Sphenoid                                      | Segment of scaphoid fossa. Maximum dimensions 18.2 mm × 13.8 mm.                                                                         |
| NN 57              | Manual phalanx.                               | Left ray 2 (?), intermediate row. Arthritic proximal articular surface.                                                                  |
| NN 58              | Metacarpal IV                                 | Proximal shaft, 32.1 mm in length. Left (?).                                                                                             |
| NN 59 <sup>‡</sup> | Ulnar shaft, right.<br><b>Not Neandertal.</b> | Distal shaft with interosseous crest. Maximum length 82.7 mm. [Conjoins with 42, 43, 44 (?), 45 (?), 46]. Fracture callus on distal end. |
| NN 60 <sup>¶</sup> | Ulna, left<br><b>Not Neandertal 1</b>         | Proximal end with olecranon and coronoid processes. Adult. Maximum proximal-distal length 47.2 mm.                                       |
| NN 61              | Mandible                                      | Fragment of left mandible at condylar neck. Maximum dimensions 26.3 × 16.4 mm.                                                           |
| NN 62              | Not human                                     |                                                                                                                                          |
| NN 63              | Not human                                     |                                                                                                                                          |
| NN 64              | Rib II, left                                  | 89.6 mm long segment preserving neck, tubercle, and shaft to position where <i>M. serratus anterior</i> attachment would have been.      |

\*Neandertal 1 preserves this portion of its right humerus. Specimen is slightly more gracile and smaller than Neandertal 1, but well-developed pectoralis major attachments suggest an adult. Platymeric shaft, relatively narrow deltoid tuberosity, and marked myologia pectoralis major attachment, and course of deltoid tuberosity relatively parallel to shaft long axis suggest a Neandertal. NN 24 may be the same individual but does not connect to the other pieces.

†This element is missing on Neandertal 1, and NN 14 is very similar to the preserved left ischial portion of Neandertal 1 in both size and morphology.

‡Neandertal 1 preserves a right ulna. This specimen must be from another adult individual.

§This deciduous molar is highly unlikely to be derived from an adult individual. Thus it cannot derive from Neandertal 1 and probably is not associated with other adult(s) at the site. Evidence of an adolescent individual in the sample.

¶Definite adult; cannot be from Neandertal 1, which possesses a left ulna. Relative equal projection of coronoid and olecranon processes yields a forward-facing semilunar notch, suggesting a Neandertal.
